# Supplementary material for: Circulating tumor DNA predicts recurrence and survival in patients with resectable gastric and gastroesophageal junction cancer
Source: PubMed Central journal article supplement (PMC11706848; doi:10.1007/s10120-024-01556-9), 2024-10-05
Supplement: 10120_2024_1556_MOESM3_ESM.pdf [file 10120_2024_1556_MOESM3_ESM.pdf]

**Supplementary Figure 1. Receiver Operating Characteristic (ROC) curve displaying performance of each methylated marker and TriMeth.** True Positive (TP) cases represent all baseline samples, while True Negative (TN) cases include post-operative samples without death or recurrence events.

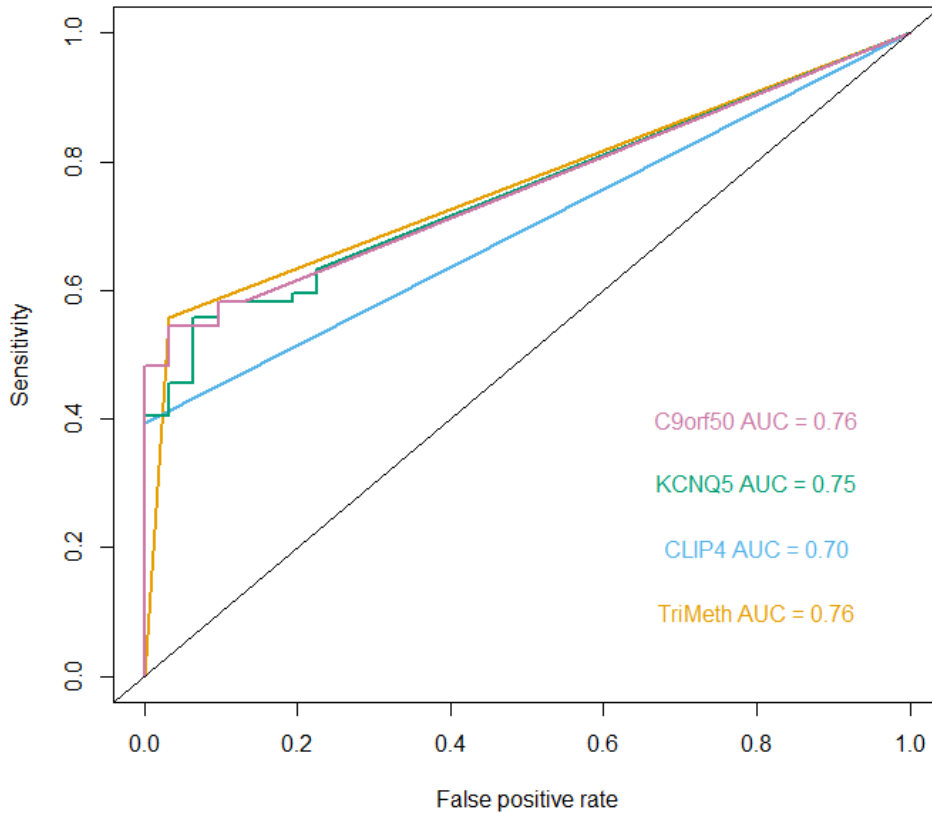

**Article title:** Circulating tumor DNA predicts recurrence and survival in patients with resectable gastric and gastroesophageal junction cancer

**Journal name:** Gastric Cancer

**Author names and affiliations:**

Cecilie Riis Iden (MD)<sup>1</sup>, Salah Mohammad Mustafa (graduate student)<sup>2,3</sup>, Nadia Øgaard (MSc, PhD)<sup>2,3</sup>, Tenna Henriksen (MSc, PhD)<sup>2,3</sup>, Sarah Østrup Jensen (MSc, PhD)<sup>2,3</sup>, Lise Barlebo Ahlborn (MSc, PhD)<sup>4</sup>, Kristian Egebjerg (MD)<sup>1</sup>, Lene Baeksgaard (MD, PhD)<sup>1</sup>, Rajendra Singh Garbyal (MD)<sup>5</sup>, Mette Kjoelhede Nedergaard (MD, PhD)<sup>5</sup>, Michael Patrick Achiam (MD, PhD)<sup>6</sup>, Claus Lindbjerg Andersen (MSc, PhD)<sup>2,3</sup>, Morten Mau-Sørensen (MD, PhD)<sup>1</sup>

1 Department of Oncology, Copenhagen University Hospital, Rigshospitalet, Blegdamsvej 9, 2100 Copenhagen, Denmark

2 Department of Molecular Medicine, Aarhus University Hospital, Palle Juul-Jensens Boulevard 99, 8200 Aarhus N, Denmark

3 Institute of Clinical Medicine, Faculty of Health, Aarhus University, Palle Juul-Jensens Boulevard 82, 8200 Aarhus N, Denmark

4 Department of Genomic Medicine, Copenhagen University Hospital, Rigshospitalet, Blegdamsvej 9, 2100 Copenhagen, Denmark

5 Department of Pathology, Copenhagen University Hospital, Rigshospitalet, Blegdamsvej 9, 2100 Copenhagen, Denmark

6 Department of Surgery & Transplantation, Copenhagen University Hospital, Rigshospitalet, Blegdamsvej 9, 2100 Copenhagen, Denmark

**E-mail address of the corresponding author:** [paul.morten.mau-soerensen@regionh.dk](mailto:paul.morten.mau-soerensen@regionh.dk)
